# Supplementary material for: Flavonoids Extraction Kinetics, Antimicrobial Activity and Radical Scavenging Potential of Bulgarian Woundwort (Solidago virgaurea L.)
Source: MDPI journal article supplement (doi:10.3390/separations9020027), 2022-01-21
Supplement: s1 [file s1]

# Flavonoids Extraction Kinetics, Antimicrobial Activity and Radical Scavenging Potential of Bulgarian Woundwort (*Solidago virgaurea* L.)

Zvezdelina Yaneva <sup>1,\*</sup>, Evgeni Simeonov <sup>2</sup>, Nikolina Rusenova <sup>3</sup>, Donika Ivanova <sup>1,4</sup>, Galina Nikolova <sup>4</sup>, Yanka Karamalakova <sup>4</sup>, Chavdar Chilev <sup>2</sup> and Georgi Beev <sup>5</sup>

<sup>1</sup> Chemistry Unit, Department of Pharmacology, Animal Physiology, Biochemistry and Chemistry, Faculty of Veterinary Medicine, Trakia University, Students Campus, 6000 Stara Zagora, Bulgaria; donika\_georgiewa@abv.bg

<sup>2</sup> Department of Chemical Engineering, Faculty of Chemical and System Engineering, University of Chemical Technology and Metallurgy, 1756 Sofia, Bulgaria; evgeni@uctm.edu (E.S.); cchilev@abv.bg (C.C.)

<sup>3</sup> Veterinary Microbiology Unit, Department of Veterinary Microbiology, Infectious and Parasitic Diseases, Faculty of Veterinary Medicine, Trakia University, Students Campus, 6000 Stara Zagora, Bulgaria; n\_v\_n\_v@abv.bg

<sup>4</sup> Department of Chemistry and Biochemistry, Faculty of Medicine, Trakia University, 11 Armeiska Str., 6000 Stara Zagora, Bulgaria; galina.nikolova@trakia-uni.bg (G.N.); yanka.karamalakova@trakia-uni.bg (Y.K.)

<sup>5</sup> Department of Biochemistry, Microbiology and Physics, Faculty of Agriculture, Trakia University, Students Campus, 6000 Stara Zagora, Bulgaria; gbeev@abv.bg

\* Correspondence: zvezdelina.yaneva@trakia-uni.bg; Tel.: +359-898-399-203

**Table S1.** Concentrations of the flavonoids quercetin, epigallocatechin and catechin in the samples of the four goldenrod extracts series.

| Sample                               | Extraction time, t, min | Quercetin concentration, µg/mL | Epigallocatechin concentration, µg/mL | Catechin concentration, µg/mL |
|--------------------------------------|-------------------------|--------------------------------|---------------------------------------|-------------------------------|
| <i>Series 1 (70% EtOH, T = 20°C)</i> |                         |                                |                                       |                               |
| S1'                                  | 5                       | 6.526                          | 1166.800                              | 576.700                       |
| S2'                                  | 10                      | 7.100                          | 1274.000                              | 732.200                       |
| S3'                                  | 15                      | 7.934                          | 1304.760                              | 794.200                       |
| S4'                                  | 20                      | 8.626                          | 1320.286                              | 912.100                       |
| S5'                                  | 30                      | 9.460                          | 1329.010                              | 936.900                       |
| S6'                                  | 60                      | 11.700                         | 1347.000                              | 1141.960                      |
| S7'                                  | 90                      | 13.000                         | 1353.800                              | 1210.310                      |
| S8'                                  | 120                     | 13.752                         | 1358.400                              | 1262.900                      |
| S9'                                  | 150                     | 17.953                         | 1369.200                              | 1386.200                      |
| <i>Series 2 (70% EtOH, T = 30°C)</i> |                         |                                |                                       |                               |
| S1                                   | 5                       | 6.405                          | 1186.560                              | 573.570                       |
| S2                                   | 10                      | 8.767                          | 1294.360                              | 740.670                       |
| S3                                   | 15                      | 9.171                          | 1324.900                              | 831.330                       |
| S4                                   | 20                      | 11.404                         | 1343.900                              | 942.440                       |
| S5                                   | 30                      | 12.854                         | 1356.460                              | 1037.230                      |
| S6                                   | 60                      | 15.383                         | 1370.840                              | 1202.710                      |
| S7                                   | 90                      | 16.751                         | 1375.770                              | 1293.710                      |
| S8                                   | 120                     | 17.508                         | 1379.360                              | 1341.510                      |
| S9                                   | 150                     | 18.900                         | 1384.230                              | 1427.040                      |
| <i>Series 3 (98% EtOH, T = 20°C)</i> |                         |                                |                                       |                               |
| S1''                                 | 5                       | 0.5174                         | 351.070                               | 68.540                        |
| S2''                                 | 10                      | 0.665                          | 436.670                               | 81.480                        |
| S3''                                 | 15                      | 0.818                          | 497.870                               | 90.370                        |
| S4''                                 | 20                      | 0.580                          | 547.180                               | 98.250                        |
| S5''                                 | 30                      | 0.819                          | 616.760                               | 108.380                       |

|                                            |     |        |          |          |
|--------------------------------------------|-----|--------|----------|----------|
| S6''                                       | 60  | 1.406  | 769.540  | 132.160  |
| S7''                                       | 90  | 2.733  | 849.890  | 146.860  |
| S8''                                       | 120 | 2.733  | 899.800  | 155.390  |
| S9''                                       | 150 | 4.757  | 1241.900 | 223.060  |
| <b>Series 4 (H<sub>2</sub>O, T = 20°C)</b> |     |        |          |          |
| S1'''                                      | 5   | 8.800  | 234.000  | 1109.000 |
| S2'''                                      | 10  | 6.340  | 248.000  | 274.000  |
| S3'''                                      | 15  | 9.790  | 264.000  | 1110.000 |
| S4'''                                      | 20  | 7.640  | 339.000  | 169.000  |
| S5'''                                      | 30  | 11.200 | 274.000  | 1202.000 |
| S6'''                                      | 60  | 11.700 | 341.000  | 1075.000 |
| S7'''                                      | 90  | 12.400 | 315.000  | 1560.000 |
| S8'''                                      | 120 | 15.300 | 309.000  | 1529.000 |
| S9'''                                      | 150 | 14.450 | 440.000  | 1512.000 |

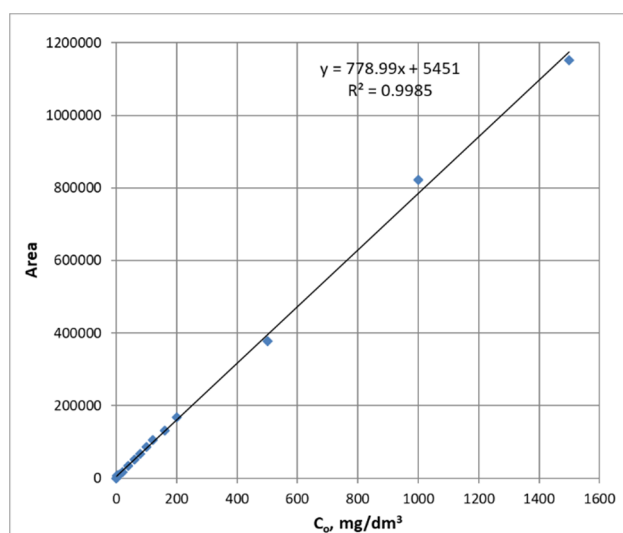

A

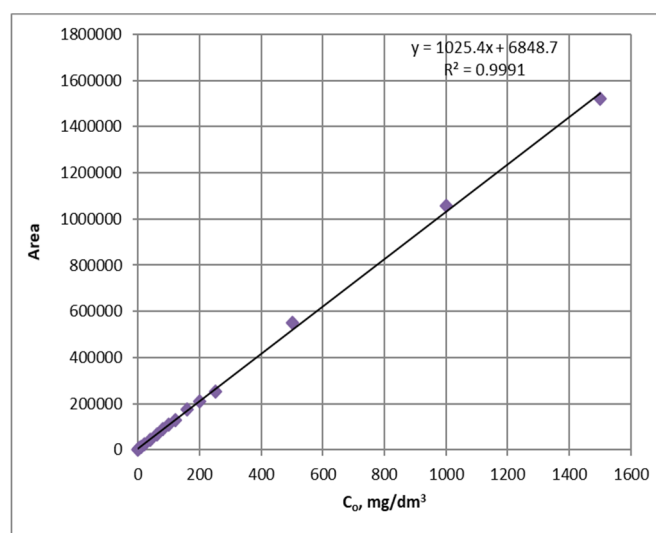

B

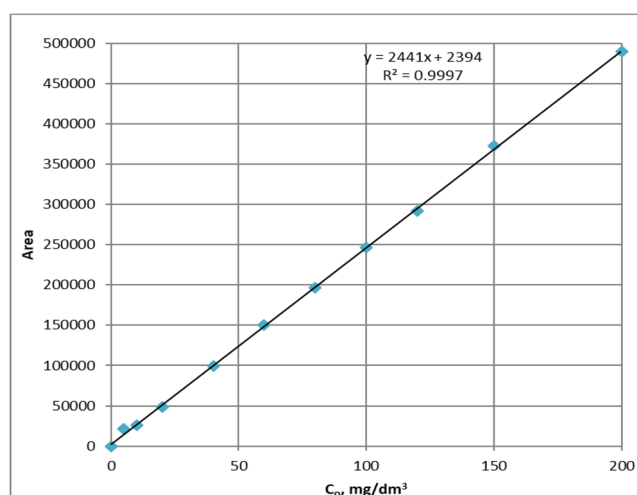

C

**Figure S1.** Calibration curves of the standard compounds A. (+)-catechin hydrate; B. (-)-epigallocatechin and C. quercetin hydrate.
